# Supplementary material for: A fine single Pd microwire H2 sensor fabricated by using a femtosecond laser for a wide detection range at room temperature
Source: Royal Society of Chemistry journal article supplement (doi:10.1039/d2na00462c), 2022-01-01
Supplement: d2na00462c1.pdf [file d2na00462c1.pdf]

1 **Supplementary Information**

2

3 **Fine Pd single microwire H<sub>2</sub> sensor fabricated by femtosecond laser**  
4 **for low detection limit at room temperature**

5 He Zhu<sup>1</sup>, Yun-Zhi Dai<sup>1</sup>, Xiang-Chao Sun, Hong Xia\*

6 State Key Laboratory of Integrated Optoelectronics, College of Electronic Science and  
7 Engineering, Jilin University, 2699 Qianjin Street, Changchun 130012, China

8 <sup>1</sup>These authors contributed equally to this work.

9

Email: [hxia@jlu.edu.cn](mailto:hxia@jlu.edu.cn) (H. Xia)

10

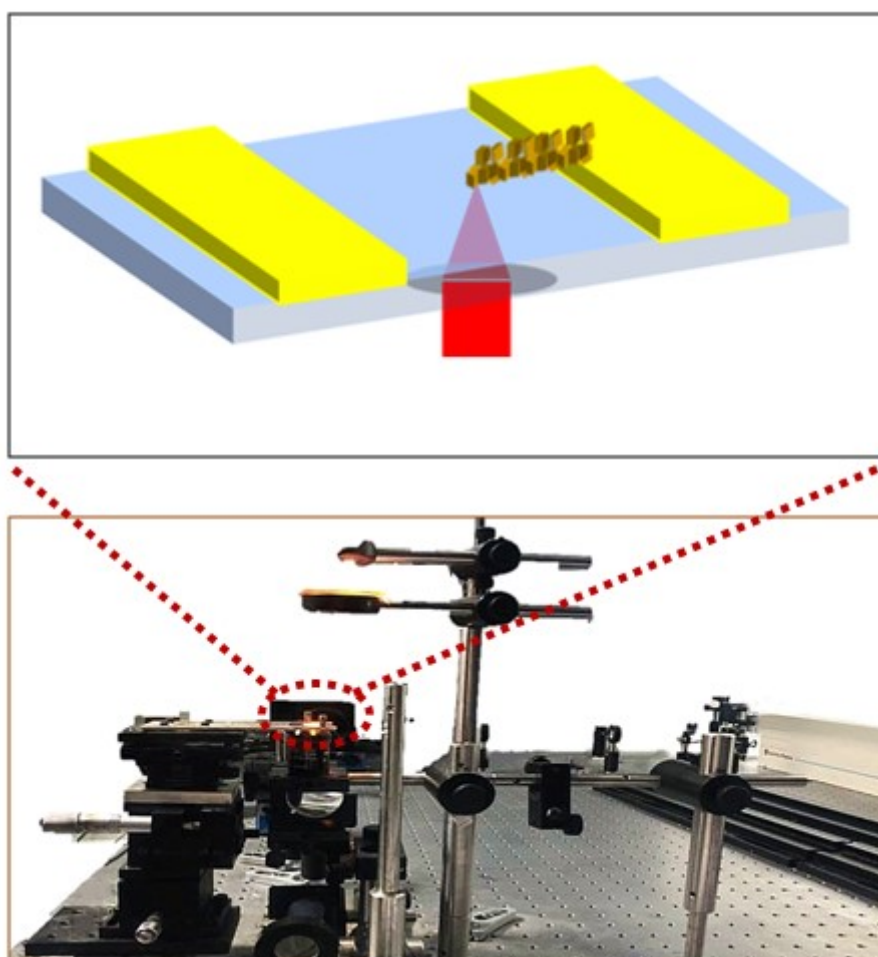

11

12 Fig. S1. The practicality photo of femtosecond laser processing system.

13

14

15

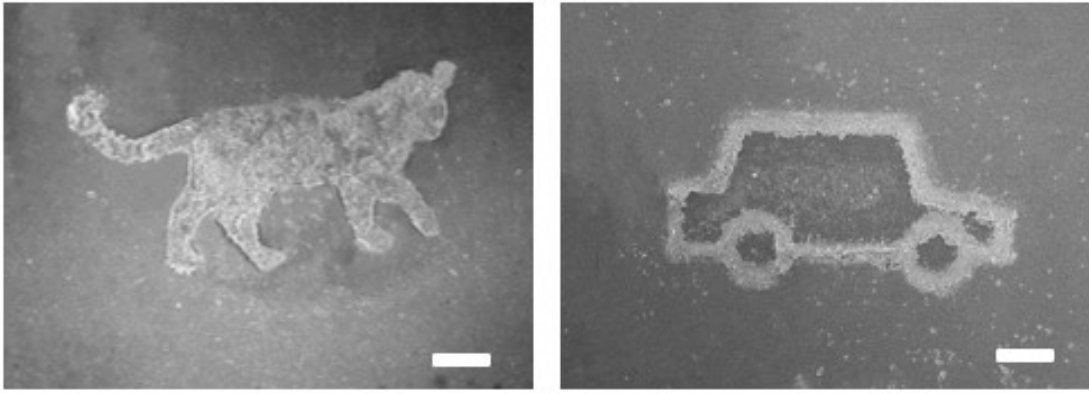

1  
2  
3  
4  
5  
6

Fig. S2. SEM images of cartoon patterns cat and car made of Pd.

The scale bar is 10  $\mu\text{m}$ .

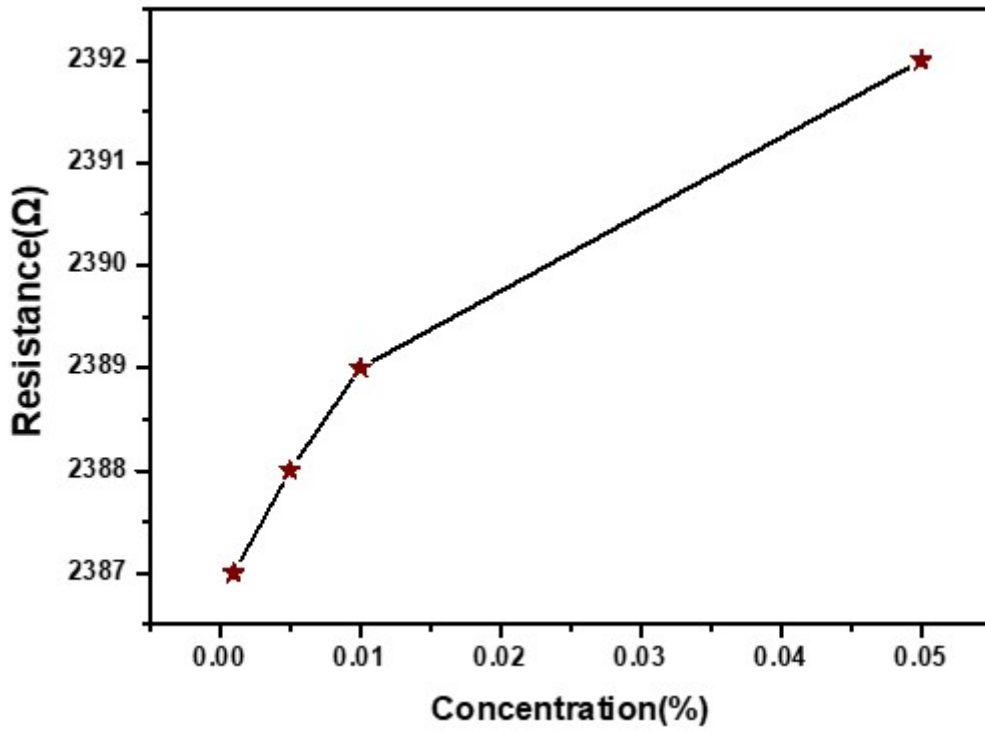

7  
8

Fig. S3. The resistance changing curve of the Pd microwire exposes 0.001-0.05%

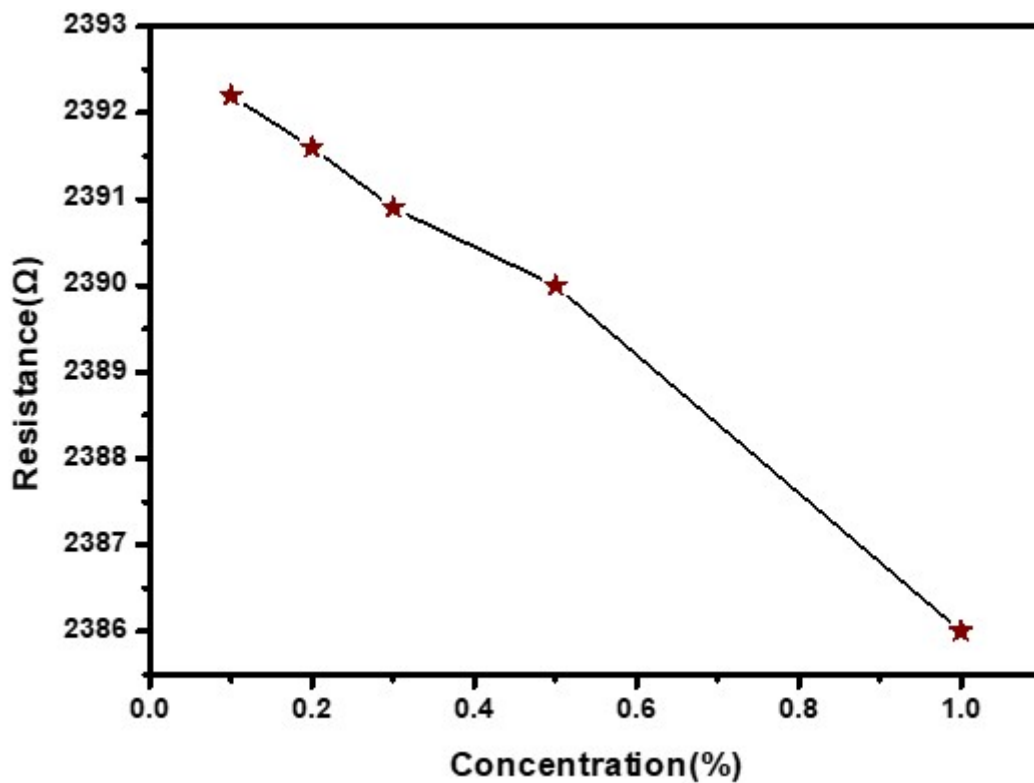

1

2 Fig. S4. The resistance changing curve of the Pd microwire exposes 0.01-0.1%

3

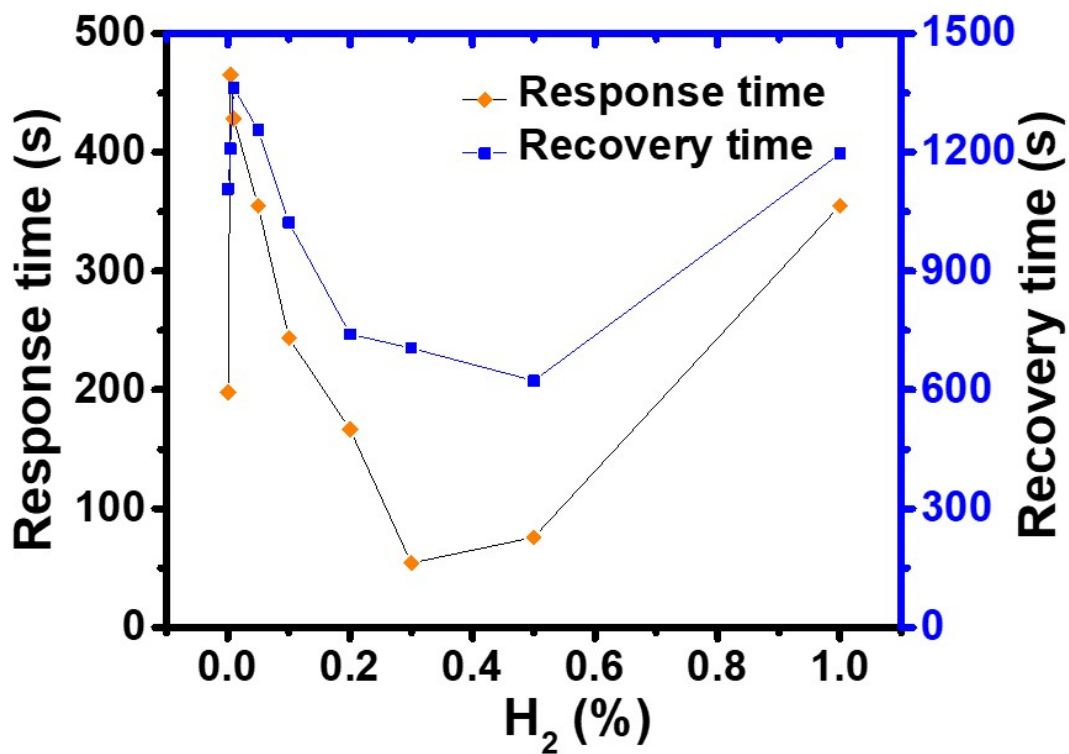

4

5 Fig. S5. Contrast between the response time and recovery time of Pd microwire  
6 sensor exposed to hydrogen concentration of 0.001% to 1.0% at room temperature.

1  
2  
3  
4

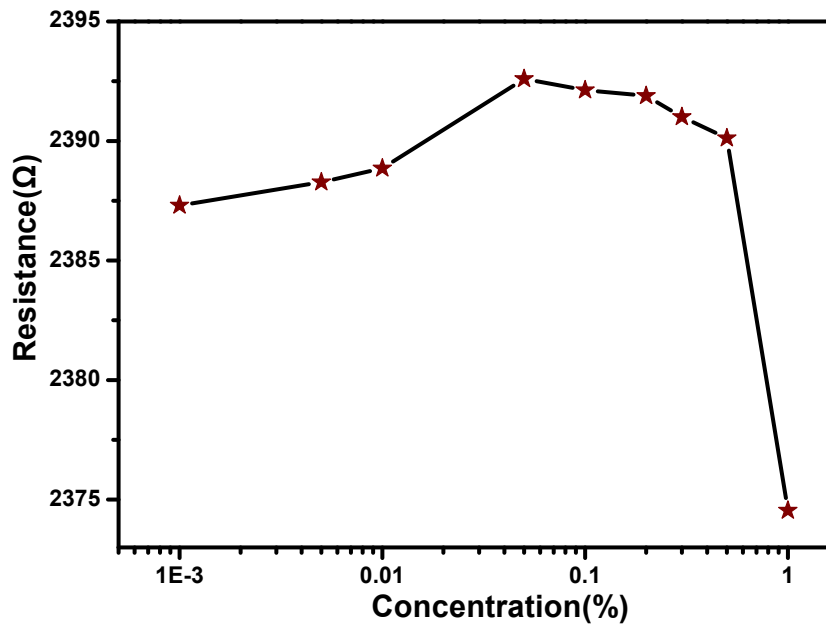

5  
6 Fig. S6. The resistance changing of the Pd microwire exposed 0.01-1% after storing in  
7 ambience for two months.

8  
9
